# Supplementary material for: Tumor-Derived Small Extracellular Vesicles Induce Pro-Inflammatory Cytokine Expression and PD-L1 Regulation in M0 Macrophages via IL-6/STAT3 and TLR4 Signaling Pathways
Source: MDPI journal article supplement (doi:10.3390/ijms222212118), 2021-11-09
Supplement: s1 [file s1]

## Supplementary Figures

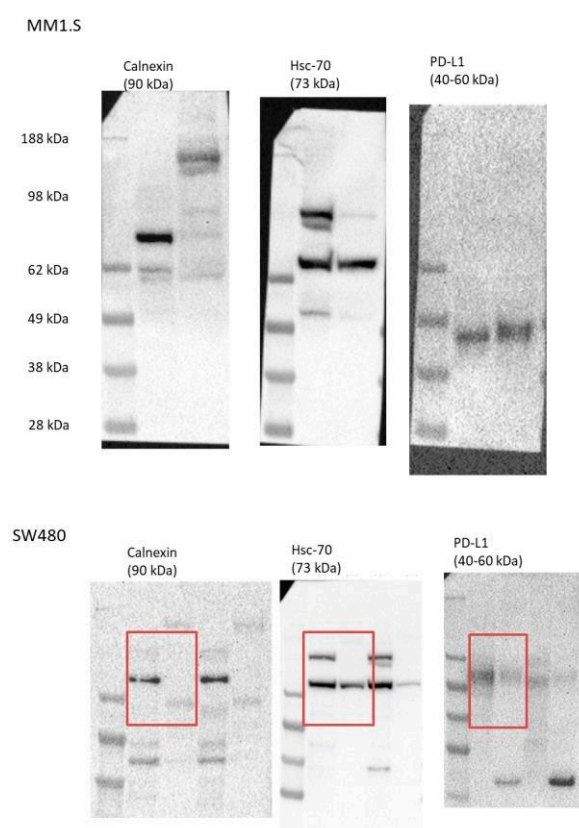

**Supplementary Figure S1.** Uncropped images of western blot in Figure 1C

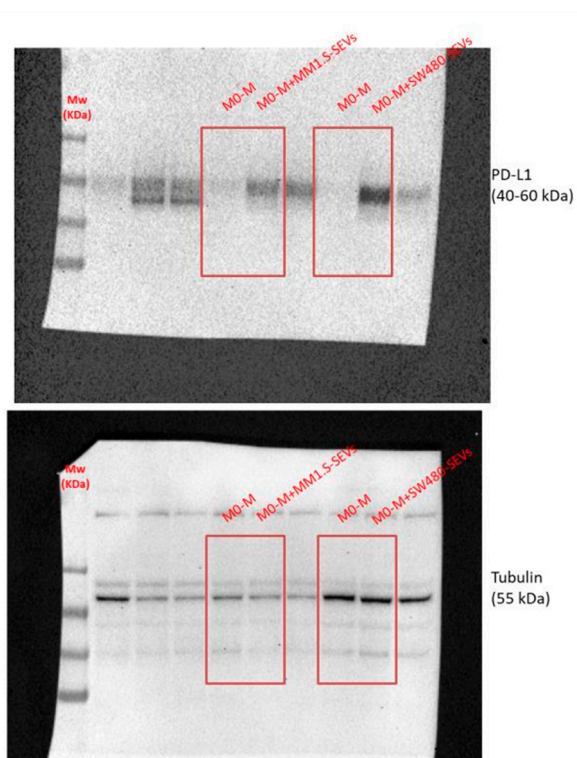

**Supplementary Figure S2.** Uncropped images of western blot in Figure 2C

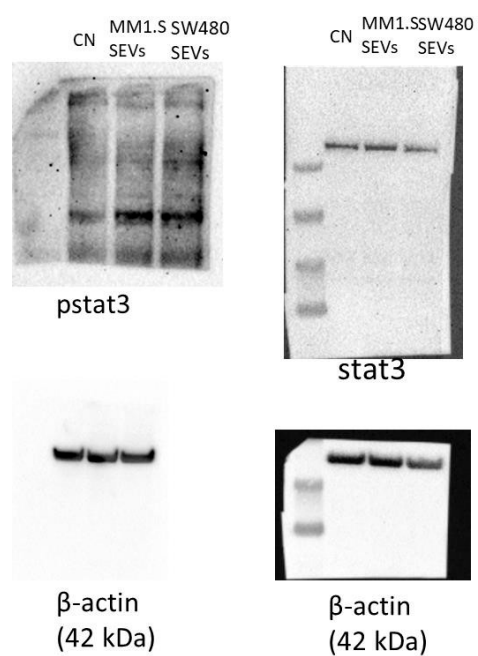

**Supplementary Figure S3.** Uncropped images of western blot in Figure 3C

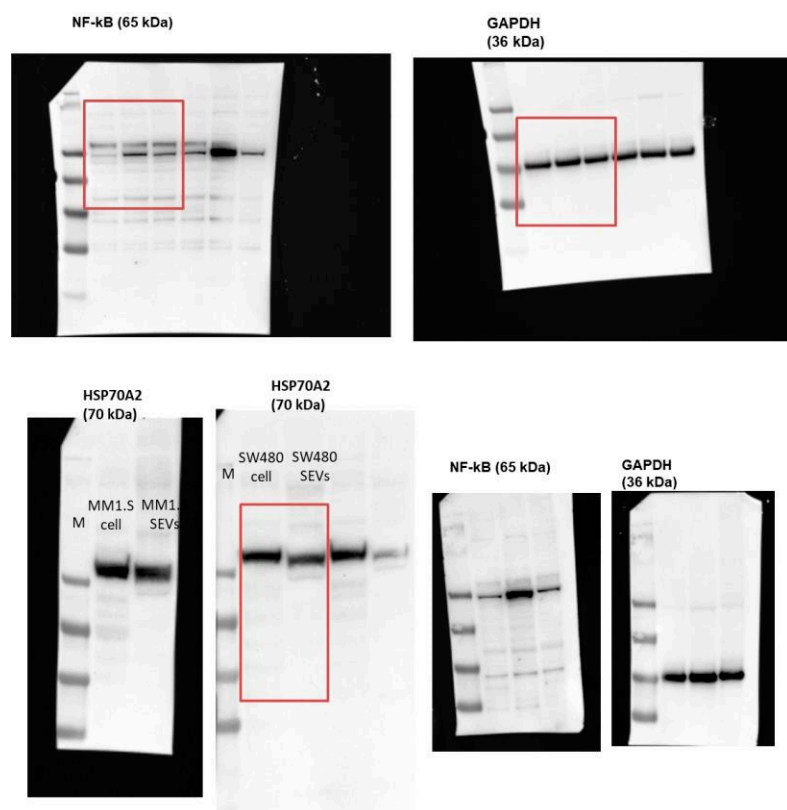

**Supplementary Figure S4.** Uncropped images of western blot in Figure 4 A-B-C

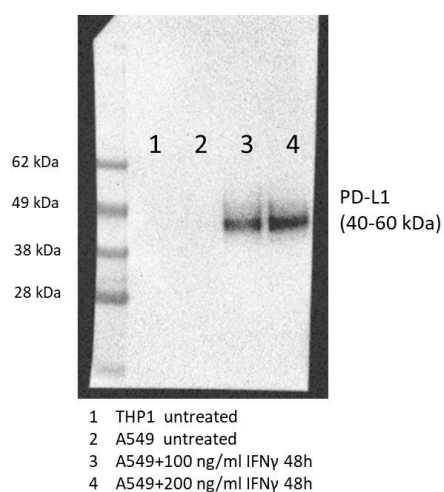

**Supplementary Figure S5.** Negative (THP-1 and A549 untreated) and Positive (A549 treated for 48h with 100 and 200 ng/ml of IFN- $\gamma$ ) controls of PD-L1 antibody.
